# Supplementary material for: Composition, Bioactivities, Safety Concerns, and Impact of Essential Oil on Pets’ and Animals’ Health
Source: Preprints.org preprint supplement (doi:10.20944/preprints202311.2008.v1), 2023-11-30
Supplement: Supplementary file 3 [file supplementary]

**Supplementary table 1**: List of compounds from selected essential oils.

| **Phytocompounds** | **Source of Essential Oil** | **References** |
| --- | --- | --- |
| Tricyclene | *Mentha spicata* | Soković et al., 2009 |
| -Thujene | *M. spicata* |
| -Pinene | *M. spicata* |
| Sabinene | *M. spicata* |
| -Pinene | *M. spicata* |
| -Myrcene | *M. spicata* |
| *p*-Cymene | *M. spicata* |
| Limonene | *M. spicata* |
| 1,8-Cineole | *M. spicata* |
| -Terpinene | *M. spicata* |
| -Terpinolene | *M. spicata* |
| Menthone | *M. spicata* |
| Menthol | *M. spicata* |
| Terpin-4-ol | *M. spicata* |
| *cis*-Dihydrocarvone | *M. spicata* |
| *trans*-Ddihydrocarvone | *M. spicata* |
| *trans*-Carveol | *M. spicata* |
| Carvone | *M. spicata* |
| Piperitone | *M. spicata* |
| *trans*-Anethole | *M. spicata* |
| -Bourbonene | *M. spicata* |
| -Caryophyllene | *M. spicata* |
| Germacrene D | *M. spicata* |

| **Phytocompounds** | **Source of Essential Oil** | **References** |
| --- | --- | --- |
| Sabinene | *Mentha piperita* | Soković et al., 2009 |
| -Myrcene | *M. piperita* |
| 3-Octanol | *M. piperita* |
| -Terpinene | *M. piperita* |
| *p*-Cymene | *M. piperita* |
| Limonene | *M. piperita* |
| 1,8-Cineole | *M. piperita* |
| *cis*-Ocimene | *M. piperita* |
| *trans*-Ocimene | *M. piperita* |
| -Terpinene | *M. piperita* |
| -Terpinolene | *M. piperita* |
| Linalool | *M. piperita* |
| Menthone | *M. piperita* |
| Menthofuran | *M. piperita* |
| Menthol | *M. piperita* |
| Pulegone | *M. piperita* |
| Piperitone | *M. piperita* |
| Menthyl acetate | *M. piperita* |
| -Bourbonene | *M. piperita* |
| -Caryophyllene | *M. piperita* |
| (*Z*)--Farnesene | *M. piperita* |
| Germacrene D | *M. piperita* |
| Bicyclogermacrene | *M. piperita* |
| Germacrene A | *M. piperita* |
| -Cadinene | *M. piperita* |
| Viridiflorol | *M. piperita* |

| **Phytocompounds** | **Source of Essential Oil** | **References** |
| --- | --- | --- |
| Sabinene | *Thymus tosevii* | Soković et al., 2009 |
| -Pinene | *T. tosevii* |
| -Terpinene | *T. tosevii* |
| *p*-Cymene | *T. tosevii* |
| Limonene | *T. tosevii* |
| *trans*-Ocimene | *T. tosevii* |
| -Terpinolene | *T. tosevii* |
| Linalool | *T. tosevii* |
| Camphor | *T. tosevii* |
| Borneol | *T. tosevii* |
| Terpin-4-ol | *T. tosevii* |
| -Terpineol | *T. tosevii* |
| Thymol methyl ether | *T. tosevii* |
| Carvacrol methyl ether | *T. tosevii* |
| Geranial | *T. tosevii* |
| *cis*-Myrtanol | *T. tosevii* |
| Bornyl acetate | *T. tosevii* |
| Thymol | *T. tosevii* |
| Carvacrol | *T. tosevii* |
| α-Terpinyl acetate | *T. tosevii* |
| Geranyl acetate | *T. tosevii* |
| *trans*-Myrtanol acetate | *T. tosevii* |
| -Caryophyllene | *T. tosevii* |
| -Humulene | *T. tosevii* |
| Germacrene D | *T. tosevii* |
| Germacrene A | *T. tosevii* |
| -Cadinene | *T. tosevii* |
| Spatulenol | *T. tosevii* |
| Caryophyllene oxide | *T. tosevii* |

| **Phytocompounds** | **Source of Essential Oil** | **References** |
| --- | --- | --- |
| -Thujene | *Thymus vulgaris* | Soković et al., 2009 |
| -Pinene | *T. vulgaris* |
| Camphene | *T. vulgaris* |
| Sabinene | *T. vulgaris* |
| -Pinene | *T. vulgaris* |
| -Myrcene | *T. vulgaris* |
| -Terpinene | *T. vulgaris* |
| *p*-Cymene | *T. vulgaris* |
| Limonene | *T. vulgaris* |
| 1,8-Cineole | *T. vulgaris* |
| *trans*-Ocimene | *T. vulgaris* |
| -Terpinene | *T. vulgaris* |
| Linalool | *T. vulgaris* |
| Camphor | *T. vulgaris* |
| Borneol | *T. vulgaris* |
| Terpin-4-ol | *T. vulgaris* |
| Thymol methyl ether | *T. vulgaris* |
| Carvacrol methyl ether | *T. vulgaris* |
| Thymol | *T. vulgaris* |
| Carvacrol | *T. vulgaris* |
| -Caryophyllene | *T. vulgaris* |
| -Humulene | *T. vulgaris* |
| Germacrene D | *T. vulgaris* |
| -Cadinene | *T. vulgaris* |

Soković MD, Vukojević J, Marin PD, Brkić DD, Vajs V, Van Griensven LJ. Chemical composition of essential oils of Thymus and Mentha species and their antifungal activities. Molecules. 2009 Jan 7;14(1):238-49.

| **Phytocompounds** | **Source of Essential Oil** | **References** |
| --- | --- | --- |
| *Cis -*3-hexenol | *Lippia alba* | Possamai et al., 2019 |
| 1-octen-3-ol | *L. alba* |
| 6-methyl-5-hepten-2-one | *L. alba* |
| Myrcene | *L. alba* |
| *Trans-* β-ocimene | *L. alba* |
| Myrtenol | *L. alba* |
| Linalool | *L. alba* |
| *Trans-p*-mentha-2,8-dien-1-ol | *L. alba* |
| *Cis*-epoxy-ocimene | *L. alba* |
| *Trans*-verbenol | *L. alba* |
| Citronellal | *L. alba* |
| *Trans-* carveol | *L. alba* |
| *Cis*-carveol | *L. alba* |
| Nerol | *L. alba* |
| Neral | *L. alba* |
| Geraniol | *L. alba* |
| Geranial | *L. alba* |
| *Trans -*geraniol | *L. alba* |
| Eugenol | *L. alba* |
| *α-*copaene | *L. alba* |
| *β-*cubebene | *L. alba* |
| *β-*elemene | *L. alba* |
| Methyl eugenol | *L. alba* |
| *Trans-*caryophyllene | *L. alba* |
| *α-* humulene | *L. alba* |
| *Trans-β-* farnezene | *L. alba* |
| *α-*amorphene | *L. alba* |
| Germacrene D | *L. alba* |
| Valencene | *L. alba* |
| *α-*muurolene | *L. alba* |
| *γ-*cadinene | *L. alba* |
| δ-cadinene | *L. alba* |
| *Cis-*nerolidol | *L. alba* |
| *Trans-*nerolidol | *L. alba* |
| Cariophyllene oxide | *L. alba* |
| *Cis- α-*santalol | *L. alba* |
| *Trans-2, trans-*6-farnesol | *L. alba* |
| 8-oxoneoisolongifolene | *L. alba* |
| 15-copaenol | *L. alba* |
| *Trans- α* sesqui ciclogeraniol | *L. alba* |

| **Phytocompounds** | **Source of Essential Oil** | **References** |
| --- | --- | --- |
| 6- metil-5-hepten-2-one | C*ymbopogon citratus* | Possamai et al., 2019 |
| Mircene | C. *citratus* |
| *Cis*-*β* -ocimene | C. *citratus* |
| *Trans- β* -ocimene | C. *citratus* |
| Citronellal | C. *citratus* |
| α -ciclocitral | C. *citratus* |
| Linalool | C. *citratus* |
| Fotocitral A | C. *citratus* |
| *Trans*-*p* -menta-1(7),8-dien-2-ol | C. *citratus* |
| Mirtenol | C. *citratus* |
| *Trans-4-* caranone | C. *citratus* |
| Nerol | C. *citratus* |
| β-citral | C. *citratus* |
| Geraniol | C. *citratus* |
| α- citral | C. *citratus* |
| Piperitenone | C. *citratus* |
| Geranic acid | C. *citratus* |
| Neril acetate | C. *citratus* |
| β -cariophyllene | C. *citratus* |
| *Trans- α* -bergamotene | C. *citratus* |
| *Trans- β* -farnesene | C. *citratus* |
| 2-tridecanone | C. *citratus* |
| Cariophyillene oxide | C. *citratus* |
| 1-*epi*-cubenol | C. *citratus* |

| **Phytocompounds** | **Source of Essential Oil** | **References** |
| --- | --- | --- |
| *Trans*-2-hexenal | *Origanum vulgare* | Possamai et al., 2019 |
| *α-*thujene | *O. vulgare* |
| *α-*pinene | *O. vulgare* |
| Sabinene | *O. vulgare* |
| Mircene | *O. vulgare* |
| α-phellandrene | *O. vulgare* |
| α-terpinene | *O. vulgare* |
| *ρ-*cimene | *O. vulgare* |
| *β-* phellandrene | *O. vulgare* |
| *cis-β* -ocimene | *O. vulgare* |
| *Trans-β* -ocimene | *O. vulgare* |
| *γ-* terpinene | *O. vulgare* |
| *Cis*-sabinete hidrate | *O. vulgare* |
| *α-* terpinolene | *O. vulgare* |
| *Trans -* sabinene hidrate | *O. vulgare* |
| 1-octen-3-il- acetate | *O. vulgare* |
| *p*-menta-2-em-1-ol | *O. vulgare* |
| 1-terpineol | *O. vulgare* |
| Terpinen-4-ol | *O. vulgare* |
| *α*-Terpineol | *O. vulgare* |
| Timol, metil éter | *O. vulgare* |
| Carvacrol, metil éter | *O. vulgare* |
| Carvone | *O. vulgare* |
| Linalil acetate | *O. vulgare* |
| Timol | *O. vulgare* |
| Carvacrol | *O. vulgare* |
| m-timol | *O. vulgare* |
| Neril acetate | *O. vulgare* |
| *α* - cubebene | *O. vulgare* |
| *β-*bourbonene | *O. vulgare* |
| *β-* cubebene | *O. vulgare* |
| *Trans-* cariophyllene | *O. vulgare* |
| *β-*gurjunene | *O. vulgare* |
| *α-*humulene | *O. vulgare* |
| *γ-* muurolene | *O. vulgare* |
| Germacrene D | *O. vulgare* |
| Biciclogermacrene | *O. vulgare* |
| Germacrene A | *O. vulgare* |
| *γ-*cadinene | *O. vulgare* |
| *δ-*cadinene | *O. vulgare* |
| Spatulenol | *O. vulgare* |
| Cariophyllene oxide | *O. vulgare* |
| Isospatulenol | *O. vulgare* |
| *α*-muurolol | *O. vulgare* |

Possamai MC, dos Santos IC, Silva ES, Gazim ZC, Gonçalves JE, Soares AA, de Melo Germano R, Fanin M, de Sá TC, Otutumi LK. In vitro bacteriostatic activity of Origanum vulgare, Cymbopogon citratus, and Lippia alba essential oils in cat food bacterial isolates. Semina: Ciências Agrárias. 2019 Sep 30;40(6Supl2):3107-22.

| **Phytocompounds** | **Source of Essential Oil** | **References** |
| --- | --- | --- |
| a-Zingiberene | *Zingiber ofﬁcinale* Roscoe | Bampidis et al., 2020 |
| b-Sesquiphellandrene | *Z. ofﬁcinale* |
| ar-Curcumene | *Z. ofﬁcinale* |
| a-Farnesene | *Z. ofﬁcinale* |
| Camphene | *Z. ofﬁcinale* |
| b-Bisabolene | *Z. ofﬁcinale* |
| b-Phellandrene | *Z. ofﬁcinale* |
| Pin-2(3)-ene (a-Pinene) | *Z. ofﬁcinale* |
| 1,8-Cineole | *Z. ofﬁcinale* |
| d-Cadinene | *Z. ofﬁcinale* |
| Germacra-1(10),4(14),5-triene | *Z. ofﬁcinale* |
| D,L-Borneol | *Z. ofﬁcinale* |
| b-Elemene | *Z. ofﬁcinale* |
| d-Limonene | *Z. ofﬁcinale* |
| a-Terpineol | *Z. ofﬁcinale* |
| (-)-a-Elemol | *Z. ofﬁcinale* |
| *trans*-Nerolidol | *Z. ofﬁcinale* |
| Farnesene (a and b) | *Z. ofﬁcinale* |
| Alloaromadendrene | *Z. ofﬁcinale* |
| Gingerols (total, HPLC) | *Z. ofﬁcinale* |
| 6-Gingerol | *Z. ofﬁcinale* |
| 8-Gingerol | *Z. ofﬁcinale* |
| 10-Gingerol | *Z. ofﬁcinale* |
| Shogaols (total, HPLC) | *Z. ofﬁcinale* |
| 6-Shogaol | *Z. ofﬁcinale* |
| 8-Shogaol | *Z. ofﬁcinale* |
| 10-Shogaol | *Z. ofﬁcinale* |
| Zingiberene | *Z. ofﬁcinale* |
| Camphene | *Z. ofﬁcinale* |
| b-Sesquiphellandrene | *Z. ofﬁcinale* |
| ar-Curcumene | *Z. ofﬁcinale* |
| b-Phellandrene | *Z. ofﬁcinale* |
| d-Limonene | *Z. ofﬁcinale* |
| b-Bisabolene | *Z. ofﬁcinale* |
| Pin-2(3)-ene | *Z. ofﬁcinale* |
| a-Farnesene | *Z. ofﬁcinale* |
| c-Cadinene | *Z. ofﬁcinale* |
| Germacrene D | *Z. ofﬁcinale* |
| Pin-2(10)-ene | *Z. ofﬁcinale* |
| Vanillyl acetone (zingerone) | *Z. ofﬁcinale* |
| Isoborneol | *Z. ofﬁcinale* |
| Hexadecanoic acid | *Z. ofﬁcinale* |
| 6,10-Dodecadien-1-yn-3-ol, 3,7,11,trimethyl | *Z. ofﬁcinale* |

EFSA Panel on Additives and Products or Substances used in Animal Feed (FEEDAP), Bampidis V, Azimonti G, Bastos MD, Christensen H, Kos Durjava M, Kouba M, López‐Alonso M, López Puente S, Marcon F, Mayo B. Safety and efficacy of essential oil, oleoresin and tincture from Zingiber officinale Roscoe when used as sensory additives in feed for all animal species. EFSA Journal. 2020 Jun;18(6):e06147.

| **Phytocompounds** | **Source of Essential Oil** | **References** |
| --- | --- | --- |
| **trans-Anethole** | *Pimpinella anisum* | Ruiz-Cano et al., 2022 |
| ***γ*-**himachalene |
| estragole, |
| 2-methyl-isoeugenol |
| Anisaldehyde |
| **Linalool** | *Ocimum basilicum* |
| **1,8-cineole** |
| **methyl eugenol** |
| estragole |
| myrcene |
| **Limonene** | *Citrus bergamia* |
| **linalyl acetate** |
| ***γ*-terpinene** |
| **linalool** |
| β-pinene |
| β-bisabolene |
| **Eugenol** | *Cinnamomum zeylanicum* |
| α-phellandrene |
| β-caryophyllene |
| benzyl benzoate |
| Cinnamyl acetate |
| **Terpinen-4-ol** | *Malaleuca alternifolia* |
| α-pinene |
| terpinolene |
| p-cymene |
| ***α*-terpineol** |
| **1,8-cineole** |
| ***α*-terpinene** |
| ***γ*-terpinene** |
| **Eugenol** | *Syzygium aromaticum* |
| ***β*-caryophyllene** |
| α-humulene |
| δ-cadinene |
| p-cymene | *Eucalyptus globulus* |
| **1,8-Cineole** |
| ***α*-pinene** |
| limonene |
| **Anethole** | *Foeniculum vulgare* |
| **fenchone** |
| α-pinene |
| limonene |
| estragole |
| anisaldehyde |
| β-phellandrene |
| **Geranial** | *Zingiber officinale* |
| **neral** |
| geraniol |
| limonene |
| ***β*-caryophyllene** | *Hypericum perforatum* |
| ***α*-Pinene,** |
| methyl-2-octane |
| dodecanol, |
| myrcene |
| **Linalyl acetate** | *Lavandula angustifolia* |
| **linalool** |
| **terpinen-4-ol** |
| **ocimene** |
| 1,8-cineole |
| camphor |
| limonene |
| **Geranial** | *Cymbopogon citratus* |
| **neral** |
| geraniol |
| geranyl acetate |
| β-caryophyllene |
| **1,8-Cineole** | *Thymus mastichina* |
| **linalool** |
| α-terpineol |
| α-pinene |
| Limonene |
| linalyle acetate |
| **Menthol** | *Mentha piperita* |
| **Menthone** |
| 1,8-cineole |
| Menthylacetate |
| Isomenthone |
| Neomenthol |
| Menthofurane |
| Limonene |
| β-caryophyllene |
| ***α*-Thuyone** | *Rosmarinus officinalis* |
| ***α*-pinene** |
| **camphene** |
| **camphor** |
| limonene |
| myrcene |
| ***α*-Thuyone** | *Artemisia vulgaris* |
| **lyratol** |
| **1,8-cineole** |
| camphor |
| β-thuyone |
| artemisinin |
| ***α*-Thuyone** | *Salvia officinalis* |
| **Camphor** |
| **1,8-cineole** |
| ***α*-humulene** |
| β-thuyone, |
| α-pinene |
| bornyle acetate |
| limonene |
| **Carvacrol** | *Satureja montana* |
| **p-cymene** |
| γ-terpinene |
| thymol |
| **1,8-cineole,** | *Thymus vulgaris* |
| ***β*-phellandrene** |
| **camphor** |
| α-pinene |
| myrcene |
| borneol |
| limonene |
| neral |

* In bold, the majority components.

Ruiz-Cano D, Sánchez-Carrasco G, El-Mihyaoui A, B. Arnao M. Essential oils and melatonin as functional ingredients in dogs. Animals. 2022 Aug 16;12(16):2089.

| **Phytocompounds** | **Source of Essential Oil** | **References** |
| --- | --- | --- |
| Terpinene | *Melaleuca alternifolia* (Tea Tree) | Ibrahium et al., 2022 |
| Dihydro-α-terpineol |
| Diterpene |
| 4-methyl-3-cyclohexen-1-yl |
| Pentatriacontane |
| 1-Octatriacontanol, |
| N-pentatriacontane |
| 17-Pentatriacontene |
| Octatriacontyl  2,2,3,3,3-pentafluoropropanoate |
| Tetrapentacontane, 1,54-dibromo- |
| 1,54-dibromotetrapentacontane |
| Octatriacontyl pentafluoropropionate |
| Nonyl tetracosyl ether |
| trans-4-Thujanol | *Citrus limon* |
| alpha-terpineol |
| beta-Fenchyl alcohol |
| α- Terpinolene |
| Dipropylene glycol |
| Camphene hydrate |
| 1-Terpinenol |
| Menthol terpine hydrate |
| (L)-alpha-Terpineol |
| cis-Citral |
| Linalool acetate |
| β-Geranial |
| α-Terpineol acetate |
| Diphenyl ether |
| Widdrol hydroxyether |
| methyl ester |
| Citral propylene glycol acetal |
| Geranial propylene glycol acetal |

Ibrahium SM, Wahba AA, Farghali AA, Abdel-Baki AA, Mohamed SA, Al-Quraishy S, Hassan AO, Aboelhadid SM. Acaricidal Activity of Tea Tree and Lemon Oil Nanoemulsions against Rhipicephalus annulatus. Pathogens. 2022 Dec 9;11(12):1506.

| **Phytocompounds** | **Source of Essential Oil** | **References** |
| --- | --- | --- |
| (*E*)-Cinnamaldehyde | *Cinnamomum verum* J. Presl  (Bark Oil) | Bampidis et al., 2022 |
| Eugenol |
| b-Caryophyllene |
| Linalool |
| Cinnamyl acetate |
| a-Phellandrene |
| 1-Isopropyl-4-methylbenzene (*p*-cymene) |
| Benzyl benzoate |
| 1,8-Cineole |
| Pin-2(3)-ene (a-pinene) |
| b-Phellandrene |
| a-Copaene |
| 3,7,10-Humulatriene |
| Safrole |
| Camphene |
| (*Z*)-Cinnamaldehyde |
| Pin-2(10)-ene (b-pinene) |
| Limonene |
| b-Caryophyllene epoxide |
| Eugenyl acetate |
| alpha-Terpinene |
| 4-Methoxybenzaldehyde |
| a-Thujene |
| a-Terpineol |
| Benzaldehyde |
| Terpinolene |
| Myrcene |
| d-3-Carene |
| Eugenol | *Cinnamomum verum* J. Presl  (Leaves oil) |
| Eugenyl acetate |
| Benzyl benzoate |
| (*E*)-Cinnamaldehyde |
| b-Caryophyllene |
| Linalool |
| Cinnamyl acetate |
| Safrole |
| a-Phellandrene |
| a-Pinene (pin-2(3)-ene) |
| *p*-Cymene (1-isopropyl-4-methylbenzene) |
| a-Copaene |
| 3,7,10-Humulatriene |
| b-Caryophyllene epoxide |
| Limonene |
| b-Phellandrene |
| Camphene |
| b-Pinene (pin-2(10)-ene) |
| a-Terpineol |
| 3-Phenylpropyl acetate |
| Benzaldehyde |
| a-Thujene |
| 1,8-Cineole |
| Cinnamyl alcohol |
| a-Terpinene |
| Terpinolene |
| Bicyclogermacrene |
| delta-Cadinene |
| Myrcene |
| 1-Isopropenyl-4-methylbenzene |
| d-3-Carene |

EFSA Panel on Additives and Products or Substances used in Animal Feed (FEEDAP), Bampidis V, Azimonti G, Bastos MD, Christensen H, Fašmon Durjava M, Kouba M, López‐Alonso M, López Puente S, Marcon F, Mayo B. Safety and efficacy of feed additives consisting of essential oils from the bark and the leaves of Cinnamomum verum J. Presl (cinnamon bark oil and cinnamon leaf oil) for use in all animal species (FEFANA asbl). EFSA Journal. 2022 Oct;20(10):e07601.

| **Phytocompounds** | **Source of Essential Oil** | **References** |
| --- | --- | --- |
| n-Octane | *Curcuma longa* (Rhizome*)* | Sharma et al., 2022 |
| α-Pinene |
| Sabinene |
| β-Pinene |
| Myrcene |
| α**-Phellandren** |
| *p*-Cymene |
| 1,8-Cineole |
| **Terpinolene** |
| Linalool |
| Camphor |
| Borneol |
| **Terpinen-4-ol** |
| Carvone |
| Perillaketone |
| Geraniol |
| Safrole |
| Thymol |
| **Sabinyl acetate** |
| Linalyl propionate |
| Cis-Carvyl acetate |
| Methyl eugenol |
| β-Patchouline |
| β-Elemene |
| β-Caryophyllene |
| ϒ-Elemene |
| α-Cadinene |
| α-Patchouline |
| ar-Curcumene |
| Zingiberene |
| (E)-Nirolidol |
| ar-Turmerone |
| α-Turmerone |
| β-Bisabolol |
| α-Pinene | *Zingiber officinale* (Rhizome) |
| Camphene |
| 2-Methyl nonane |
| Myrcene |
| α-Phellandrene |
| 3-Octen-2-one |
| (+)-α-Limonene |
| β**-Phellandrene** |
| α-Terpinolene |
| *n*-Nonenal |
| 2-Methyl undecane |
| 3-Methyl butanol |
| *n*-Nonan-2-one |
| α-Nagniatene |
| α-Cubebene |
| δ-Elemene |
| *p*-Menth-1-en-8-ol acetate |
| Cyclosativene |
| α-Copaene |
| *n*-Undecanol |
| Geranyl acetate |
| Camphor isomer |
| Methyl eugenol |
| Bergamotene |
| α-Santalene |
| Geranyl propionate |
| α-Farnesene |
| ϒ-Elemene |
| *n*-Decanyl acetate |
| Neryl acetone |
| Allo-Aromadendrene |
| Germacrene D |
| β-Funebrene |
| **Zingiberene** |
| **Valencene** |
| Selina-4(14),7(11)-diene |
| **Citronellyl *n*-butyrate** |
| α-Muurolene |
| Cuparene |
| α-Bisabolene |
| β-Bisabolene |
| ϒ-Cadinene |
| β-Curcumene |

Sharma G, Sharma R, Rajni E, Saxena R. Synergistic, antidermatophytic activity and chemical composition of essential oils against zoonotic dermatophytosis. Russian Journal of Bioorganic Chemistry. 2022 Dec;48(6):1338-47.

| **Phytocompounds** | **Source of Essential Oil** | **References** |
| --- | --- | --- |
| Sabinene | *Myristica fragrans* Houtt (Seeds) | Bampidis et al., 2023 |
| a-Pinene (pin-2(3)-ene) |
| Myristicin |
| b-Pinene (pin-2(10)ene) |
| 4-Terpinenol |
| Limonene |
| c-Terpinene |
| b-Pinene (pin-2(10)ene) |
| 4-Terpinenol |
| Limonene |
| c-Terpinene |
| a-Terpinene |
| Myrcene |
| b-Phellandrene |
| Safrole[(a)](#_bookmark18) |
| a-Thujene |
| Terpinolene |
| d-3-Carene |
| a-Phellandrene |
| *p*-Cymene (1-isopropyl-4-methylbenzene) |
| *(E)*-isoeugenol |
| a-Terpineol |
| Camphene |
| Elemicin |
| *trans*-Sabinene hydrate |
| p-Pentylanisole |
| 4-Allyl-2,6-dimethoxyphenol |
| a-Copaene |
| Eugenol |
| Linalool |
| a-Terpinyl acetate |
| Methyleugenol[(b)](#_bookmark19) |
| *cis*-Sabinene hydrate |
| Geranyl acetate |
| *cis*-*p*-2-menthen-1-ol |
| *d,l*-Bornyl acetate |
| *trans*-*p*-2-menthen-1-ol |
| d-Cadinene |
| Ethanol |

EFSA Panel on Additives and Products or Substances used in Animal Feed (FEEDAP), Bampidis V, Azimonti G, Bastos MD, Christensen H, Durjava M, Kouba M, López‐Alonso M, López Puente S, Marcon F, Mayo B. Safety and efficacy of a feed additive consisting of an essential oil from the seeds of Myristica fragrans Houtt.(nutmeg oil) for all animal species (FEFANA asbl). EFSA Journal. 2023 Jun;21(6):e08066.

| **Phytocompounds** | **Source of Essential Oil** | **References** |
| --- | --- | --- |
| 1,8-Sineol | *Alpinia galanga* | Daning et al., 2021 |
| cis-ß-Farnesene |
| ß-Pinene |
| Phenol, 4-(2-propenyl)-, acetate |
| (S)-4-(1-Acetoxyallyl)phenyl acetate |
| Eugenol |
| Geranyl acetate |
| Caryophyllene |
| Farnesol, acetate |
| ß-Bisabolene |
| Cyclohexene |
| 3-Octen-5-yne |
| Terpineol |
| (E)-Hexadec-2-enal |
| Terpinene |
| trans-Carveyl acetate |
| Bornyl acetate |

Daning D, Widyobroto B, Hanim C, Yusiati LM. Effect of Galangal (Alpinia galanga) essential oil supplementation on milk production, composition, and characteristics of fatty acids in dairy cows. Advances in Animal and Veterinary Sciences. 2021;10(1):192-202.

| **Phytocompounds** | **Source of Essential Oil** | **References** |
| --- | --- | --- |
| α-Thujene | *Rosmarinus ofﬁcinalis* L. | Jiang et al., 2011 |
| α-Pinene |
| Camphene |
| β-Pinene |
| β-Phellandrene |
| α-Terpinene |
| p-Cymene |
| Limonene |
| 1,8-Cineole |
| γ-Terpinene |
| Linalool |
| Isopulegol |
| Cis-chrysanthenol |
| Camphor |
| Borneol |
| Terpinene 4-ol |
| α-Terpineol |
| Verbenone |
| Bornyl acetate |
| Geranyl acetate |
| β-Caryophyllene |
| α-Caryophyllene |

Jiang Y, Wu N, Fu YJ, Wang W, Luo M, Zhao CJ, Zu YG, Liu XL. Chemical composition and antimicrobial activity of the essential oil of Rosemary. Environmental toxicology and pharmacology. 2011 Jul 1;32(1):63-8.

| **Phytocompounds** | **Source of Essential Oil** | **References** |
| --- | --- | --- |
| cis-α-santalol | *Santalum album* L. | Subasinghe et al., 2013 |
| epi-α-bisabalol |
| epi-β-santalol |
| cis-β-santalol |
| cis-nuciferol |
| γ-curcumen-12-ol |
| β-  curcumen-12-ol |
| cis-lanceol |
| E,E farnesol |
| cis-α-trans bergamatol |

Subasinghe U, Gamage M, Hettiarachchi DS. Essential oil content and composition of Indian sandalwood (Santalum album) in Sri Lanka. Journal of Forestry Research. 2013 Mar;24(1):127-30.

| **Phytocompounds** | **Source of Essential Oil** | **References** |
| --- | --- | --- |
| Silane, triethylfluoro- | *Azadirachta indica* | Hussein et al., 2017 |
| 9-Octadecenoic acid (Z)-, methyl ester |
| Hexadecanoic acid, ethyl ester |
| Oleic Acid |
| Linoleic acid ethyl ester |
| Tetradecanoic acid |
| n-Hexadecanoic acid |
| 2-[2-[2-[2-[2-[2-[2-[2-[2-[2-(2- Hydroxyethoxy)ethoxy]ethoxy] |
| Methanesulfonyl chloride | *Lavandula angustifolia* |
| Eucalyptol |
| Silane, triethylfluoro- |
| Bicyclo[2.2.1]heptan-2-one, 1,7,7-trimethyl-, (+)- |
| 1,6-Octadien-3-ol, 3,7-dimethyl- |
| 3-Cyclohexene-1-methanol, a,a4-trimethyl- |

Hussein KA, Joo JH. Chemical composition of neem and lavender essential oils and their antifungal activity against pathogenic fungi causing ginseng root rot. Afr J Biotechnol. 2017;16(52):2349-54.
